# Supplementary material for: Metabolic Alterations Identified in Urine, Plasma and Aortic Smooth Muscle Cells Reflect Cardiovascular Risk in Patients with Programmed Coronary Artery Bypass Grafting
Source: MDPI journal article supplement (doi:10.3390/antiox10091369), 2021-08-27
Supplement: s1 [file s1]

**Table S1.** Instrumental conditions for target analysis of metabolites by (SRM)-LC-MS/MS.

| Metabolite name            | Precursor mass (m/z) | Fragment mass (m/z) | Dwell time (ms) | Fragmentor (V) | Collision energy (V) | Polarity |
|----------------------------|----------------------|---------------------|-----------------|----------------|----------------------|----------|
| 1-methylhydantoin          | 113.1                | 69.1                | 50              | 90             | 10                   | Negative |
| 2-hydroxyphenylacetic acid | 151.2                | 107.1               | 50              | 72             | 10                   | Negative |
| 3-hydroxybutyric acid      | 103.1                | 59.1                | 50              | 60             | 10                   | Negative |
| 3-ureidopropionic acid     | 133.13               | 115.1               | 20              | 70             | 10                   | Positive |
| acetylcholine              | 147.2                | 88.1                | 20              | 60             | 14                   | Positive |
| alanine                    | 90.1                 | 44.1                | 40              | 130            | 22                   | Positive |
| arabitol                   | 153.2                | 61.2                | 20              | 60             | 34                   | Positive |
| aspartic acid              | 134.11               | 74.2                | 20              | 60             | 10                   | Positive |
| choline                    | 105.18               | 64.2                | 20              | 60             | 10                   | Positive |
| cyclohexanol               | 101.2                | 84                  | 20              | 130            | 10                   | Positive |
| glucuronic acid            | 193.1                | 112.9               | 50              | 120            | 10                   | Negative |
| glutamic acid              | 147.9                | 102                 | 40              | 175            | 18                   | Positive |
| glutamine                  | 147.15               | 84.1                | 20              | 84             | 18                   | Positive |
| glutathione                | 308                  | 84.1                | 20              | 175            | 40                   | Positive |
| glyceric acid              | 107.8                | 61.2                | 20              | 144            | 10                   | Positive |
| glycerophosphocholine      | 258.2                | 104                 | 20              | 132            | 10                   | Positive |
| guanidoacetic acid         | 118.1                | 76.1                | 20              | 120            | 10                   | Positive |
| malic acid                 | 133                  | 115.1               | 50              | 84             | 10                   | Negative |
| N-acetylalanine            | 132.14               | 44.3                | 40              | 120            | 26                   | Positive |
| N-acetylneuraminic acid    | 308.3                | 87                  | 50              | 90             | 10                   | Negative |
| oxalacetic acid            | 131.1                | 86.8                | 50              | 100            | 10                   | Negative |
| pantothenic acid           | 220.4                | 90.1                | 20              | 80             | 14                   | Positive |
| p-benzoquinone             | 109.9                | 69                  | 20              | 74             | 10                   | Positive |
| phosphocholine             | 185.1                | 57.2                | 20              | 60             | 14                   | Positive |
| putrescine                 | 89.2                 | 72.2                | 20              | 60             | 10                   | Positive |
| pyruvic acid               | 87.1                 | 43.3                | 50              | 60             | 10                   | Negative |
| scyllo-inositol            | 181.2                | 137.1               | 20              | 130            | 14                   | Positive |
| spermidine                 | 146.3                | 72.2                | 20              | 60             | 14                   | Positive |
| threitol                   | 121.13               | 75.1                | 20              | 60             | 10                   | Negative |
| threonine                  | 120.13               | 102.9               | 20              | 130            | 18                   | Positive |
| TMAO                       | 76.1                 | 59                  | 20              | 175            | 22                   | Positive |
| tyramine                   | 138.2                | 121.1               | 20              | 60             | 10                   | Positive |
| valine                     | 118.16               | 58.1                | 20              | 130            | 30                   | Positive |



**Table S2.** Metabolites previously identified by our group in association with cardiorenal risk uEA: early atherosclerosis, detected in urine [12]. aEA: early atherosclerosis, detected in aorta [13]. ACS: acute coronary syndrome at the onset [12]. ALB: subjects with moderately increased albuminuria [10].

| Metabolite name            | Previous studies | Reference  |
|----------------------------|------------------|------------|
| 1-methylhydantoin          | ACS              | [12]       |
| 2-hydroxyphenylacetic acid | ACS              | [12]       |
| 3-hydroxybutyric acid      | ACS, ALB         | [12], [10] |
| 3-ureidopropionic acid     | ALB              | [10]       |
| acetylcholine              | aEA              | [13]       |
| alanine                    | ACS              | [12]       |
| arabitol                   | ACS              | [12]       |
| aspartic acid              | aEA              | [13]       |
| choline                    | aEA              | [13]       |
| cyclohexanol               | ACS              | [12]       |
| glucuronic acid            | aEA              | [13]       |
| glutamic acid              | aEA, ALB         | [13], [10] |
| glutamine                  | aEA              | [13]       |
| glutathione                | aEA              | [13]       |
| glyceric acid              | ALB              | [10]       |
| glycerophosphocholine      | aEA              | [13]       |
| guanidoacetic acid         | aEA, ALB         | [13], [10] |
| malic acid                 | ALB              | [10]       |
| N-acetylalanine            | aEA              | [13]       |
| N-acetylneuraminic acid    | ACS              | [12]       |
| oxalacetic acid            | ALB              | [10]       |

---

|                  |          |            |
|------------------|----------|------------|
| pantothenic acid | ALB      | [10]       |
| p-benzoquinone   | ACS      | [12]       |
| phosphocholine   | aEA      | [13]       |
| putrescine       | ACS      | [12]       |
| pyruvic acid     | aEA, ALB | [13], [10] |
| scyllo-inositol  | ACS      | [12]       |
| spermidine       | ACS      | [12]       |
| threitol         | aEA      | [13]       |
| threonine        | aEA      | [13]       |
| TMAO             | aEA      | [13]       |
| tyramine         | aEA      | [13]       |
| valine           | aEA      | [13]       |

---
